# Supplementary material for: Anti-glioblastoma activity of monensin and its analogs in an organoid model of cancer
Source: PubMed Central journal article supplement — Biomed Pharmacother. Author manuscript; Available in PMC 2022 Sep 14. (PMC9472755; doi:10.1016/j.biopha.2022.113440), 2022-07-20
Supplement: NIHMS1833557-supplement-1.pdf [file NIHMS1833557-supplement-1.pdf]

# Anti-glioblastoma activity of monensin and its analogues in an organoid model of cancer

Alicja Urbaniak <sup>1\*</sup>, Megan R. Reed <sup>1</sup>, Billie Heflin <sup>1</sup>, John Gaydos <sup>1</sup>, Sergio Piña-Oviedo <sup>2</sup>, Marta Jędrzejczyk <sup>3</sup>, Greta Klejborowska <sup>3</sup>, Natalia Stępczyńska <sup>3</sup>, Timothy C. Chambers <sup>1</sup>, Alan J. Tackett <sup>1</sup>, Analiz Rodriguez <sup>4</sup>, Adam Huczyński <sup>3</sup>, Robert L. Eoff <sup>1</sup> and Angus M. MacNicol <sup>5</sup>

<sup>1</sup> Department of Biochemistry and Molecular Biology, University of Arkansas for Medical Sciences, Little Rock, AR 72205, United States of America

<sup>2</sup> Department of Pathology, University of Arkansas for Medical Sciences, Little Rock, AR 72205, United States of America

<sup>3</sup> Department of Medical Chemistry, Faculty of Chemistry, Adam Mickiewicz University, Umultowska 89b, 61-614 Poznań, Poland

<sup>4</sup> Department of Neurosurgery, University of Arkansas for Medical Sciences, Little Rock, AR 72205, United States of America

<sup>5</sup> Department of Neurobiology and Developmental Sciences, University of Arkansas for Medical Sciences, Little Rock, AR 72205, United States of America

\* Corresponding Author; e-mail: [aurbaniak@uams.edu](mailto:aurbaniak@uams.edu). UAMS Biochemistry/Dr. Urbaniak 4301 W. Markham, Slot 516 Little Rock, AR 72205-7199. Phone: 501-686-5954.

**Supplementary material**

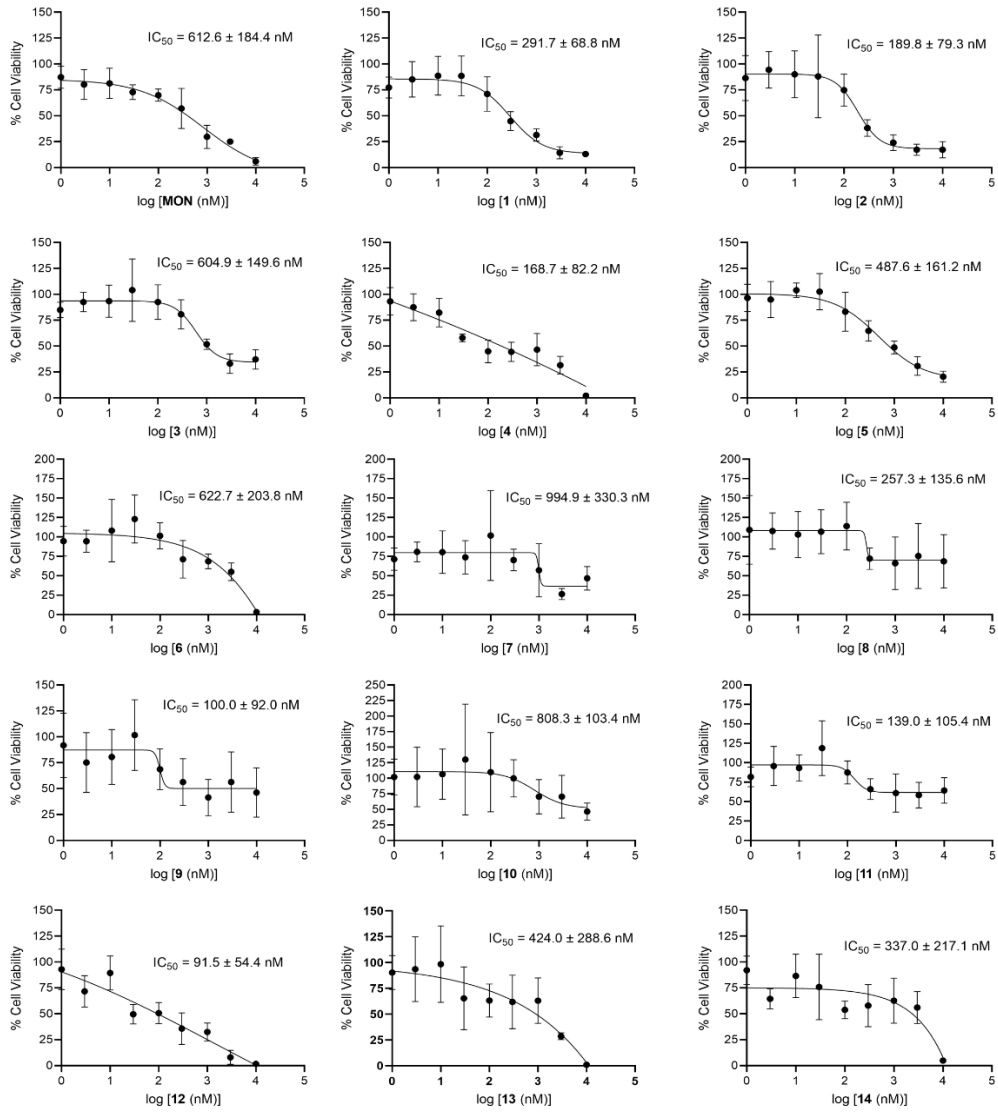

**Figure S1.** Cell viability was determined by MTT mini-ring assay. Results are given as mean  $\pm$  SD (n = 4). The graphs represent sensitivity of U118 MG glioblastoma derived organoids to **MON** and its analogues. Mini-rings were treated with vehicle (100% viability) or increasing concentrations of compounds (see Experimental Section for details).

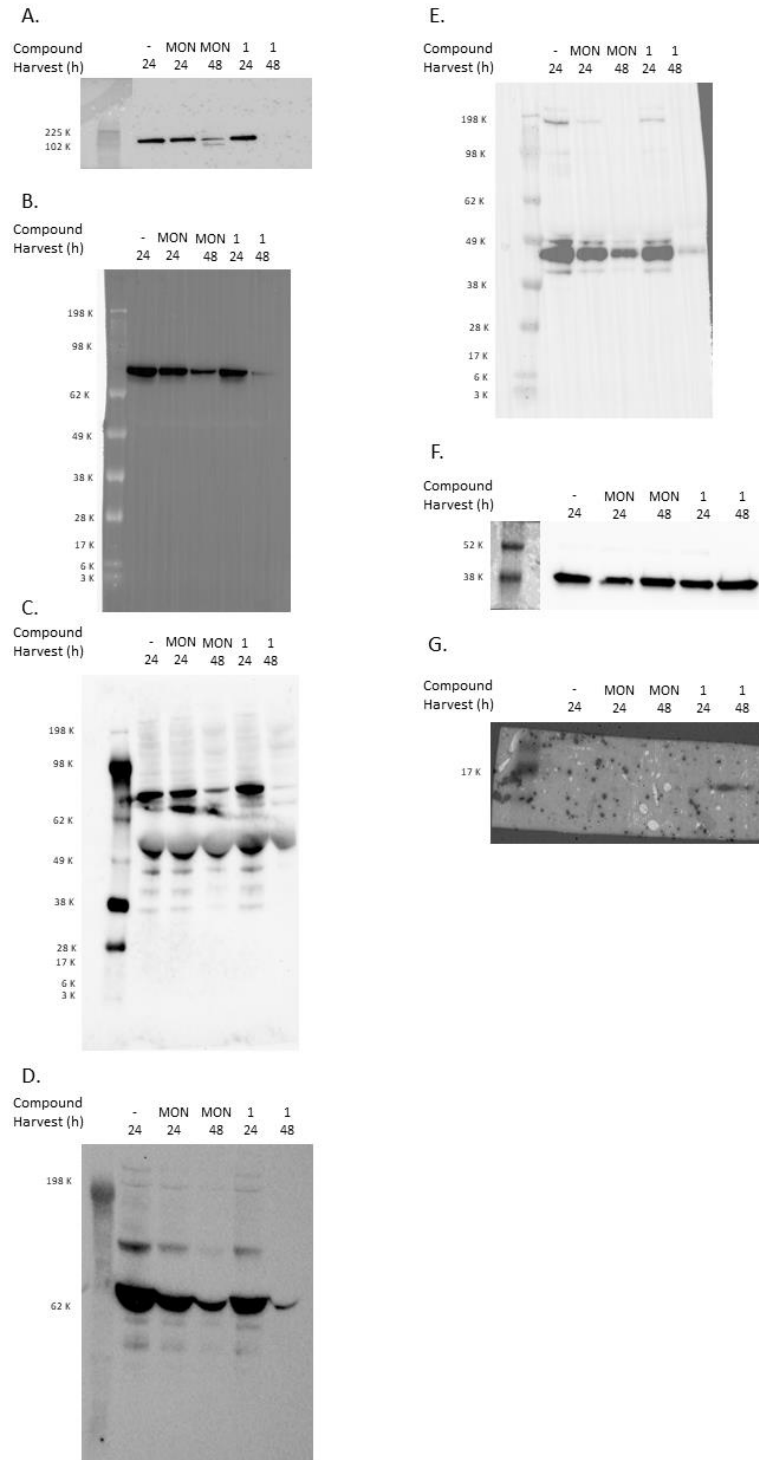

**Figure S2.** Uncropped immunoblots for whole cell lysate samples. Images of full blots of the samples shown as cropped images in Figure 5. The following primary antibodies were used for probing each blot: **A** PARP; **B** STAT3; **C** p-STAT3; **D** p-Akt; **E** p-GSK-3 $\beta$ ; **F** GAPDH; **G**  $\gamma$ H2AX. The reference molecular weight ladder is shown towards the left of each blot. Of note, in some instances the membranes were cut prior staining in order to ensure simultaneous staining with more than one antibody against proteins of different molecular weights.

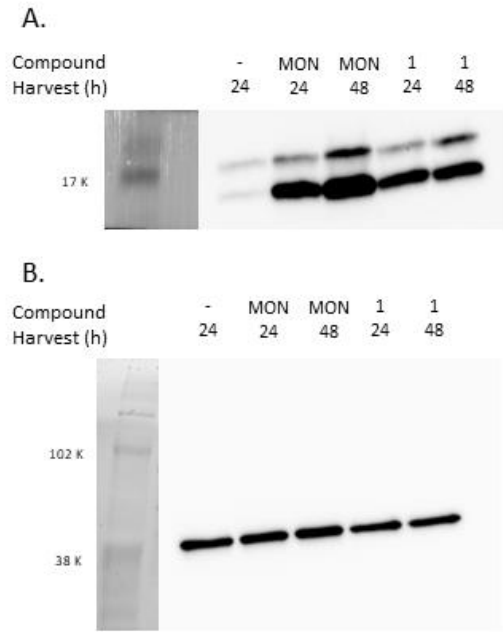

**Figure S3.** Uncropped immunoblots for whole cell lysate samples. Images of full blots of the samples shown as cropped images in Figure 6. The following primary antibodies were used for probing each blot: **A** LC3B; **B** GAPDH. The reference molecular weight ladder is shown towards the left of each blot. Of note, membrane in the panel A was cut prior staining in order to ensure simultaneous staining with other antibodies.
